# Supplementary material
Source: publisher site journal article supplement (https://www.dovepress.com/article/398399)
Supplement: Supplementary file 1 [file get_supplementary_file.php]

MLP

classifier = sk_nn.MLPClassifier(activation="identity",solver="adam",alpha=0.01,learning_rate="adaptive",learning_rate_init=0.1,max_iter=20,hidden_layer_size=(10,10),verbose=True)

classifier = xgboost.XGBClassifier(bootstrap=True, criterion='entropy',max_depth=20, max_features='sqrt', max_leaf_nodes=None,max_samples=None, min_impurity_decrease=0.02,min_impurity_split=None, min_samples_leaf=3,min_samples_split=5, n_estimators=10, n_jobs=-1, oob_score=False,verbose=0, warm_start=False)
